# Supplementary material
Source: PubMed Central journal article supplement (PMC3166458)
Supplement: embor2011132s3.pdf [file embor2011132s3.pdf]

Manuscript EMBOR-2010-34589

## **RodZ regulates the post-transcriptional processing of the Shigella type III secretion system**

Jiro Mitobe, Itaru Yanagihara, Kiyohisa Ohnishi, Shouji Yamamoto, Makoto Ohnishi, Akira Ishihama, Haruo Watanabe

*Corresponding author: Jiro Mitobe, National Institute of Infectious Diseases*

---

**Review timeline:**

Submission date:

24 November 2010

Accepted:

14 June 2011

---

**No Peer Review Process File is available with this article, as the authors have chosen not to make the review process public in this case.**
