# Supplementary material
Source: PubMed Central journal article supplement (PMC3166458)

# Supplemental Figure 1

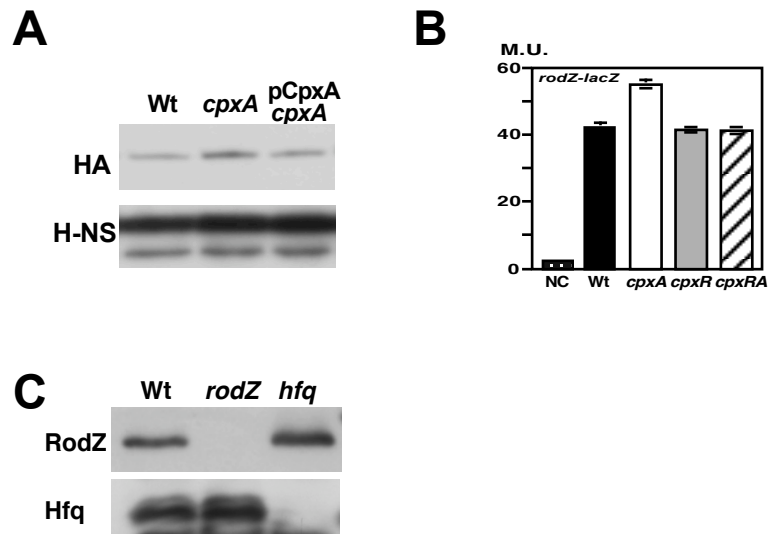

# Supplemental Figure 2

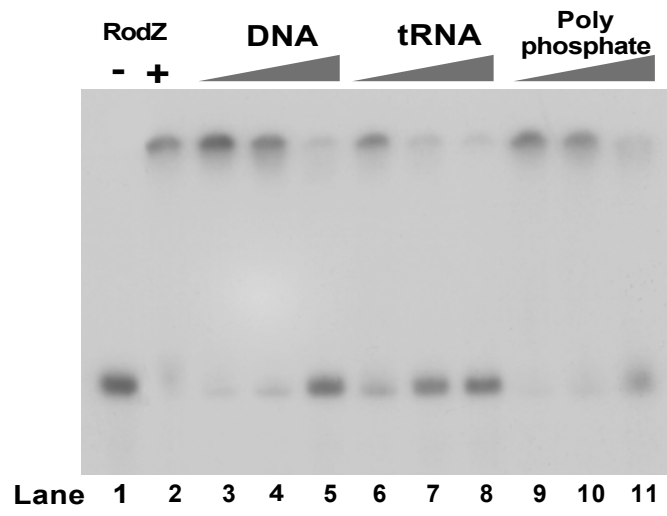

# Supplemental Figure 3

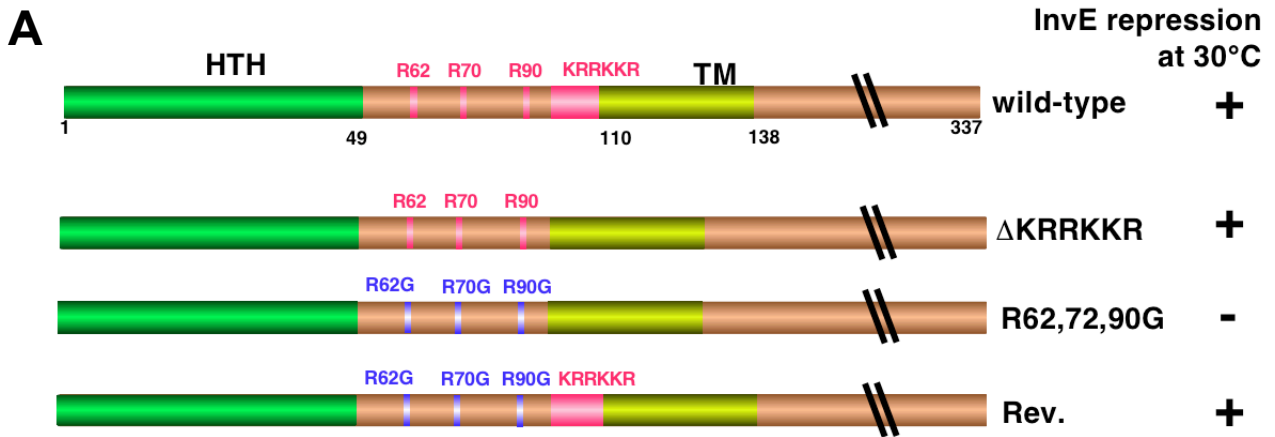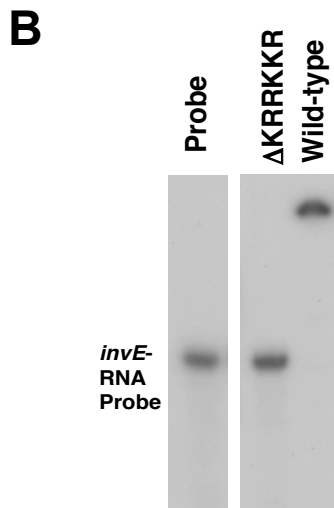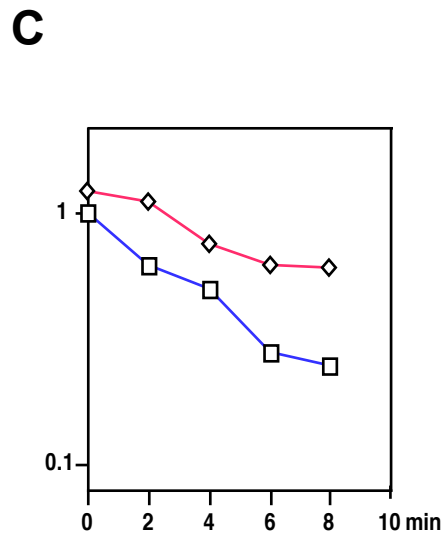

Supplement: embor2011132s1.pdf [file embor2011132s1.pdf]
